# Supplementary material for: Detection of surface contamination for particulate metals using spark emission spectroscopy
Source: Royal Society of Chemistry journal article supplement (doi:10.1039/d4ja00031e), 2024-01-01
Supplement: d4ja00031e1.pdf [file d4ja00031e1.pdf]

## **ELECTRONIC SUPPLEMENTARY INFORMATION**

### **Detection of surface contamination for particulate metals using spark emission spectroscopy**

Lina Zheng,<sup>\*a</sup> Jing Huang,<sup>b</sup> Lingyu Liu,<sup>b</sup> Jialin Li,<sup>b</sup> Zikang Feng<sup>b</sup> and Yingshuo Zhu<sup>b</sup>

*<sup>a</sup>Department of Occupational Hygiene Engineering, School of Safety Engineering, China University of Mining and Technology, Xuzhou 221116, Jiangsu, P.R. China.*

*<sup>b</sup>School of Safety Engineering, China University of Mining and Technology, Xuzhou 221116, Jiangsu, P.R. China.*

\*Author for correspondence: [zhenglina@cumt.edu.cn](mailto:zhenglina@cumt.edu.cn)

Table S1 Signal intensity values corresponding to surface element concentrations of Co, Cr, Fe, and Mn.

| Co                                        |                        |        | Cr                                        |                        |        |
|-------------------------------------------|------------------------|--------|-------------------------------------------|------------------------|--------|
| surface concentration, ng/cm <sup>2</sup> | Signal intensity, a.u. | yError | surface concentration, ng/cm <sup>2</sup> | Signal intensity, a.u. | yError |
| 66.9                                      | 4115                   | 2164   | 14.7                                      | 2356                   | 476    |
| 132.3                                     | 4688                   | 1720   | 29.1                                      | 5812                   | 2541   |
| 400.8                                     | 6904                   | 3898   | 88.3                                      | 12543                  | 2818   |
| 801.7                                     | 12323                  | 3527   | 176.6                                     | 15578                  | 4002   |
| 2004.2                                    | 20715                  | 2277   | 353.3                                     | 24177                  | 1417   |
| 4008.5                                    | 34371                  | 10924  | 706.6                                     | 44268                  | 12940  |

  

| Fe                                        |                        |        | Mn                                        |                        |        |
|-------------------------------------------|------------------------|--------|-------------------------------------------|------------------------|--------|
| surface concentration, ng/cm <sup>2</sup> | Signal intensity, a.u. | yError | surface concentration, ng/cm <sup>2</sup> | Signal intensity, a.u. | yError |
| 16.6                                      | 1291                   | 813    | 24.5                                      | 487                    | 249    |
| 32.7                                      | 2142                   | 972    | 48.4                                      | 1385                   | 1284   |
| 99.2                                      | 8024                   | 2353   | 146.8                                     | 3859                   | 2156   |
| 198.4                                     | 6914                   | 2473   | 293.5                                     | 6294                   | 1527   |
| 396.8                                     | 13257                  | 587    | 587.0                                     | 10740                  | 709    |
| 793.5                                     | 24451                  | 7219   | 1174.0                                    | 13176                  | 5046   |

Table S2 Comparison of surface elemental concentration measured by SES method and NIOSH method 9102 for measuring surfaces contaminated with welding fume.

| Cr                            |        | Cr                     |        |
|-------------------------------|--------|------------------------|--------|
| NIOSH 9102:ng/cm <sup>2</sup> | xError | SES:ng/cm <sup>2</sup> | yError |
| 4.6                           | 3.1    | 58.6                   | 3.8    |
| 145.2                         | 47.5   | 62.1                   | 11.4   |
| 195.0                         | 95.1   | 89.5                   | 4.2    |
| 444.4                         | 17.8   | 264.1                  | 15.2   |

  

| Fe                            |        | Fe                     |        |
|-------------------------------|--------|------------------------|--------|
| NIOSH 9102:ng/cm <sup>2</sup> | xError | SES:ng/cm <sup>2</sup> | yError |
| 108.4                         | 42.8   | 231.0                  | 72.8   |
| 616.3                         | 212.1  | 376.4                  | 292.3  |
| 805.9                         | 400.0  | 695.5                  | 204.4  |
| 1955.6                        | 0      | 1622.4                 | 489.4  |

| Mn<br>NIOSH 9102:ng/cm <sup>2</sup> | xError | Mn<br>SES:ng/cm <sup>2</sup> | yError |
|-------------------------------------|--------|------------------------------|--------|
| 164.1                               | 66.7   | 100.9                        | 34.3   |
| 663.7                               | 222.3  | 486.3                        | 310.3  |
| 853.3                               | 393.1  | 738.6                        | 172.1  |
| 2074.1                              | 102.6  | 1434.1                       | 303.1  |
